# Supplementary material for: CRISPR directed evolution of the spliceosome for resistance to splicing inhibitors
Source: PubMed Central journal article supplement (PMC6489355; doi:10.1186/s13059-019-1680-9), 2019-04-30
Supplement: 13059_2019_1680_MOESM2_ESM.pdf [file 13059_2019_1680_MOESM2_ESM.pdf]

## Additional file 2

### CRISPR-directed evolution of the spliceosome for resistance to splicing inhibitors

Haroon Butt<sup>1</sup>, Ayman Eid<sup>1</sup>, Afaque A. Momin<sup>2</sup>, Jeremie Bazin<sup>3</sup>, Martin Crespi<sup>3</sup>, Stefan T. Arold<sup>2</sup>, and Magdy M. Mahfouz<sup>1,\*</sup>

<sup>1</sup>Laboratory for Genome Engineering and Synthetic Biology, King Abdullah University of Science and Technology (KAUST), Thuwal, Saudi Arabia, <sup>2</sup>Division of Biological and Environmental Sciences and Engineering, Computational Bioscience Research Center, KAUST, Thuwal, Saudi Arabia, and <sup>3</sup>CNRS, INRA, Institute of Plant Sciences Paris-Saclay IPS2, Univ Paris Sud, Univ Evry, Univ Paris-Diderot, Sorbonne Paris-Cite, Universite Paris-Saclay, Orsay, France.

\*Correspondence to Magdy Mahfouz ([Magdy.mahfouz@kaust.edu.sa](mailto:Magdy.mahfouz@kaust.edu.sa))

#### Additional File 2:

**Table S1:** Sequences of sgRNAs with PAM targeting SF3B1

**Table S2:** List of primers annealed to synthesis sgRNAs with *BsaI* compatible overhangs

**Table S3:** List of primers used for genotyping

**Table S4:** CDE-platform for SF3B1 resistance to splicing inhibitor

**Table S5:** List of primers used for Intron retention analysis

**Table S1: Sequences of sgRNAs with PAM targeting SF3B1**

| sgRNA | 5'-sgRNA sequence-3' (PAM is underlined) |
|-------|------------------------------------------|
| 1     | GGAGCTCGCGCGGGCGCAGG <u>AGG</u>          |
| 2     | GGAGCGCAAGAAGATGGAGG <u>AGG</u>          |
| 3     | <u>CCG</u> CCGGCGCGCCCATGGCCGTC          |
| 4     | <u>CCT</u> TCGACACCGATCTCTACGGC          |
| 5     | <u>CCG</u> ACCCCAACCGCTTCGCCGGC          |
| 6     | <u>CCT</u> CCATCCCCGCCTCCGAGGAC          |
| 7     | CTCCGAGGACGACGCGCCCG <u>AGG</u>          |
| 8     | <u>CCG</u> AGGCGGCCGTCAACCCCGCC          |
| 9     | <u>CCG</u> GCCGCCTCGCCTCCTACACC          |
| 10    | <u>CCG</u> GCCACGCCGTCGCCGCCGCC          |
| 11    | CGACATCCCCCGCGCCGCCG <u>AGG</u>          |
| 12    | <u>CCA</u> AGAAGTCGCAGCGCATCATC          |
| 13    | <u>CCG</u> CGAGGATGACTATCGCCGCC          |
| 14    | GCTGGCCCGCATCATCTCGCCG <u>G</u>          |
| 15    | <u>CCG</u> GAGCGCCATGATCCCTTCGC          |
| 16    | CCACCCCGGACCCTTCCGTG <u>GCGG</u>         |
| 17    | <u>CCG</u> ATGCCATGCGCGAGAATGAC          |
| 18    | <u>CCT</u> GCAGAAGCAGAAGGAGCAGC          |
| 19    | TGACATAGCTCAGAAGAAGA <u>AGG</u>          |
| 20    | GGAGAAGGCCAAGGAGAAGA <u>AGG</u>          |
| 21    | GCCGAAGCGCCGCAATAGATG <u>GGG</u>         |
| 22    | CAATAGATGGGATCAGTCG <u>CAGG</u>          |
| 23    | GGTGATGCTTCTGCTGCTGCT <u>G</u>           |
| 24    | GGCGAAGACCTCCTCCGATT <u>GGG</u>          |
| 25    | GATGCTCCTGATGCAACTCCT <u>G</u>           |
| 26    | GGGCGCTGGGATGCCACCCCT <u>G</u>           |
| 27    | <u>CCC</u> CTGGTCGTGTCGGGGATGCG          |
| 28    | GTCGGTGAGAAGGAATCGTT <u>GGG</u>          |
| 29    | <u>CCG</u> TCCGGTGAGAAGGAATCGTTG         |
| 30    | <u>CCG</u> ATGCGGATGCAACACCTGCA          |
| 31    | GCAGCTGGTGGCATTACTCC <u>AGG</u>          |
| 32    | <u>CCT</u> TCTGGAGCTTGGGATGCTAC          |
| 33    | <u>CCT</u> GGTGGGCTTGTCACGCCAAC          |
| 34    | <u>CCA</u> ACACCCAAGAAGCAGAGATC          |
| 35    | <u>CCT</u> GCAAGTATGGGTAGTGCTAC          |
| 36    | <u>CCT</u> GGAGGCACTGGTGCTGCGAC          |
| 37    | <u>CCT</u> GCAGGTTACACTCCTGGTCC          |
| 38    | <u>CCA</u> TTTGGTGGTGACAACCTTGC          |
| 39    | <u>CCA</u> ACACCCGCCAGATTGCTTC           |
| 40    | CAGAGCAGTACCAGCTCTTG <u>C</u> GG         |
| 41    | GAACAGGCCTCTTACGGATG <u>AGG</u>          |
| 42    | GCTTGATACTATGTTCCCGC <u>AGG</u>          |
| 43    | <u>CCG</u> CAGGAAGGGTACAAGATTCT          |
| 44    | <u>CC</u> AGCTTCATACCAACCCATACG          |
| 45    | <u>CC</u> AGCAAGAAAGCTGCTCGCTAC          |
| 46    | ACCATTGTATGCTATTCTG <u>AGG</u>           |
| 47    | GCTATTCTGAGGAGAATCGT <u>G</u>            |
| 48    | GTGCCAAGGAGTTGCCTGGT <u>G</u>            |
| 49    | GTTGCCCTCATGAAGCCAG <u>AGG</u>           |
| 50    | <u>CCA</u> GTA CTTTGAACATTGCTGA          |
| 51    | GCTATCTCCAGAAGAGCAGA <u>AGG</u>          |
| 52    | GATCATGAAGCTCCTGCTCA <u>AGG</u>          |
| 53    | <u>CC</u> ACAGCGGAAGACAGCACTTCG          |

|                |                                         |
|----------------|-----------------------------------------|
| 54             | <u>G</u> CTCATGCAGCCAACACTT <u>GAGG</u> |
| 55             | TGACAGGGTACTGTATAAGCT <u>G</u> G        |
| 56             | <u>CCG</u> TCCGTTTGTGCATAAGATTC         |
| 57             | GACTACTATGCTCGTGT <u>TGAGGG</u>         |
| 58             | <u>CCGGG</u> AGATTATCTCAAATCTTA         |
| 59             | TCAAATCTTAGCAAAGCTGCT <u>G</u> G        |
| 60             | <u>CCGCC</u> ATGAGACCAGATATTGAT         |
| 61             | CACTGCTAGAGCATT <u>TAGCGTGG</u>         |
| 62             | TAGCGTGGTGGCTTCTGCTT <u>TGG</u>         |
| 63             | TCCTGGCAAGCTCGGCACACT <u>G</u> G        |
| 64             | <u>CCTGG</u> CAAGCTCGGCACACTGGT         |
| 65             | CAGCAGATTGCTATTCTTAT <u>GGG</u>         |
| 66             | <u>CCTAG</u> TTGAGATCATTGAGCATG         |
| 67             | GTGACGAGAACCAGAAAGT <u>GCGG</u>         |
| 68             | <u>CCAG</u> AAAGTGC GGACAATCACTG        |
| 69             | AAGGGTATCAGATCTCACCGT <u>G</u> G        |
| 70             | <u>CCGTG</u> GAAAGGTTCTTGCTGCCT         |
| 71             | GCTGCCTTCTTGAAAGCTAT <u>TGG</u>         |
| 72             | <u>CCTCT</u> TATGGATGCGCTGTATGC         |
| 73             | <u>CCTG</u> ATTAGGGAGTTCAGTCAC          |
| 74             | GATGAAGAAGATTGCCTGA <u>AGG</u>          |
| 75             | GTGTAGAGGCTGATTATAT <u>CCGG</u>         |
| 76             | GGAGAATGGCTCTGGACCGC <u>AGG</u>         |
| 77             | GTAGAGATGGCAAATAAGGT <u>TGG</u>         |
| 78             | TATTGTTGGGAGGATTGTTG <u>AGG</u>         |
| 79             | GCCTTACAGGAGAATGGTGAT <u>G</u> G        |
| 80             | GGTGATGGAAACAATTGAGA <u>AGG</u>         |
| 81             | TTGGAGGAGCTGCTTATTGAT <u>TGG</u>        |
| 82             | <u>CCTT</u> ACCTTCCTCAGATTTGTGG         |
| 83             | AAGCTGCTGATCTGATCTCG <u>AGG</u>         |
| 84             | GTGTCAGGAGGAGCAGCTTAT <u>G</u> G        |
| 85             | GAAGAGTACCCTGAGGTGTT <u>GGG</u>         |
| 86             | <u>CCGCC</u> AATCAAGGATCTTCTTCC         |
| 87             | GAATAGGCATGAGAAGGTCC <u>AGG</u>         |
| 88             | GAGAACTGCATTGATCTAGT <u>TGG</u>         |
| 89             | GTTGGTAGGATTGCTGATCGT <u>G</u> G        |
| 90             | TGCCTGCTAGGGAGTGGATG <u>AGG</u>         |
| 91             | AATGTTGAAGGCTCACAAGA <u>AGG</u>         |
| 92 (HR-target) | ATGTTGAAGGCTCACAAGA <u>AGG</u>          |
| 93             | AGGCTCACAAGAAGGGTATT <u>AGA</u>         |
| 94             | CTCACAAGAAGGGTATTAGA <u>AGA</u>         |
| 95             | GGTTATATTGCGAAGGCTATT <u>G</u> G        |
| 96             | GTTGAATAACTTGAAGGTGC <u>AGG</u>         |
| 97             | <u>CCGTG</u> TCTGCACAAGTTCGCAA          |
| 98             | <u>CCTG</u> ATGAATGAGTACCGAGTCC         |
| 99             | GTATATTGGTGAGATGGGCA <u>AGG</u>         |
| 100            | <u>CCTG</u> CTTGAAGATGCTCTAATG          |
| 101            | GCTGTGAAGCACATGGCTCT <u>TGG</u>         |
| 102            | TGTTGCTGGCTTGGGCTGTG <u>AGG</u>         |
| 103            | GCTGTCATGGAGGCGATTG <u>AGGG</u>         |
| 104            | GAGGGGATGAGAGTTGCTCT <u>TGG</u>         |
| 105            | <u>CCAG</u> CTGTGATCTTGAATTACTG         |
| 106            | <u>CCAT</u> CCAGCAAGGAAAGTACGTG         |
| 107            | TCCTGCACTGGATGACGAT <u>GGGG</u>         |

|     |                                  |
|-----|----------------------------------|
| 108 | <u>TATCTACAGCCGTCCAGAGCTGG</u>   |
| 109 | GATGAGACTCCTGCAAGTAT <u>GGG</u>  |
| 110 | <u>CCAGAAGAGCAGAAGGAGAGGAA</u>   |
| 111 | AAAGCAAGGGAATTTGGTGCT <u>GG</u>  |
| 112 | <u>CCATTGTTCAACAAGATTCTACC</u>   |
| 113 | <u>CCAGATATTGATAACATTGATGA</u>   |
| 114 | ATAACATTGATGAGTATGTG <u>GAGA</u> |
| 115 | <u>CCACTGCTAGAGCATTTAGCGTG</u>   |
| 116 | <u>CCAGTCACCAGATGAAGAGATGA</u>   |
| 117 | <u>CCAGATGAAGAGATGAAGAAGAT</u>   |
| 118 | <u>CCGGCAAACCTGCTGCCTCTGCTG</u>  |
| 119 | CACATTGGTTATATTGCGA <u>AAGG</u>  |

**Table S2: List of primers annealed to synthesis sgRNAs with *BsaI* compatible overhangs**

| Name of the primer | Sequence (5' - 3')              |
|--------------------|---------------------------------|
| F1                 | <u>GGCAGGAGCTCGCGCGGGCGCAGG</u> |
| F2                 | <u>GGCAGGAGCGCAAGAAGATGGAGG</u> |
| F3                 | <u>GGCAGACGGCCATGGGCGCGCCGG</u> |

|     |                                  |
|-----|----------------------------------|
| F4  | <u>GGC</u> AGCCGTAGAGATCGGTGTCGA |
| F5  | <u>GGC</u> AGCCGGCGAAGCGGTTGGGGT |
| F6  | <u>GGC</u> AGTCCTCGGAGGCGGGGATGG |
| F7  | <u>GGC</u> ACTCCGAGGACGACGCGCCCG |
| F8  | <u>GGC</u> AGGCGGGGTTGACGGCCGCCT |
| F9  | <u>GGC</u> AGGTGTAGGAGGCGAGGCGGC |
| F10 | <u>GGC</u> AGGCGGCGGCGACGGCGTGGC |
| F11 | <u>GGC</u> ACGACATCCCCCGCGCCGCCG |
| F12 | <u>GGC</u> AGATGATGCGCTGCGACTTCT |
| F13 | <u>GGC</u> AGGCGGCGATAGTCATCCTCG |
| F14 | <u>GGC</u> AGCTGGCCCGCATCATCTCGC |
| F15 | <u>GGC</u> AGCGAAGGGATCATGGCGCTC |
| F16 | <u>GGC</u> ACCACCCCGACCCTTCCGTG  |
| F17 | <u>GGC</u> AGTCATTCTCGCGCATGGCAT |
| F18 | <u>GGC</u> AGCTGCTCCTTCTGCTTCTGC |
| F19 | <u>GGC</u> ATGACATAGCTCAGAAGAAGA |
| F20 | <u>GGC</u> AGGAGAAGGCCAAGGAGAAGA |
| F21 | <u>GGC</u> AGCCGAAGCGCCGCAATAGAT |
| F22 | <u>GGC</u> ACAATAGATGGGATCAGTCGC |
| F23 | <u>GGC</u> AGGTGATGCTTCTGCTGCTGC |
| F24 | <u>GGC</u> AGGCGAAGACCTCCTCCGATT |
| F25 | <u>GGC</u> AGATGCTCCTGATGCAACTCC |
| F26 | <u>GGC</u> AGGGCGCTGGGATGCCACCCC |
| F27 | <u>GGC</u> ACGCATCCCCGACACGACCAG |
| F28 | <u>GGC</u> AGTCGGTGAGAAGGAATCGTT |
| F29 | <u>GGC</u> ACAACGATTCTTCTCACCGA  |
| F30 | <u>GGC</u> ATGCAGGTGTTGCATCCGCAT |
| F31 | <u>GGC</u> AGCAGCTGGTGGCATTACTCC |
| F32 | <u>GGC</u> AGTAGCATCCCAAGCTCCAGA |
| F33 | <u>GGC</u> AGTTGGCGTGACAAGCCCACC |
| F34 | <u>GGC</u> AGATCTCTGCTTCTTGGGTGT |
| F35 | <u>GGC</u> AGTAGCACTACCCATACTTGC |
| F36 | <u>GGC</u> AGTCGCAGCACCAGTGCCTCC |
| F37 | <u>GGC</u> AGGACCAGGAGTGTAACCTGC |
| F38 | <u>GGC</u> AGCAAGGTTGTCACCACCAAA |
| F39 | <u>GGC</u> AGAAGCAATCTGGCCGGGTGT |
| F40 | <u>GGC</u> ACAGAGCAGTACCAGCTCTTG |
| F41 | <u>GGC</u> AGAACAGGCCTCTTACGGATG |
| F42 | <u>GGC</u> AGCTTGATACTATGTTCCCGC |
| F43 | <u>GGC</u> AGAATCTTGTACCCTTCTG   |
| F44 | <u>GGC</u> ACGTATGGGTTGGTATGAAGC |
| F45 | <u>GGC</u> AGTAGCGAGCAGCTTTCTTGC |
| F46 | <u>GGC</u> AACCATTGTATGCTATTCCTG |
| F47 | <u>GGC</u> AGCTATTCTGAGGAGAATCG  |

|     |                                   |
|-----|-----------------------------------|
| F48 | <u>GGCAGT</u> GCCCAAGGAGTTGCCTGG  |
| F49 | <u>GGCAGTTG</u> CCCCCATGAAGCCAG   |
| F50 | <u>GGC</u> ATCAGCAATGTTCCAAAGTAC  |
| F51 | <u>GGCAG</u> CTATCTCCAGAAGAGCAGA  |
| F52 | <u>GGCAGAT</u> CATGAAGCTCCTGCTCA  |
| F53 | <u>GGC</u> ACGAAGTGCTGTCTTCCGCTG  |
| F54 | <u>GGCAGCT</u> CATGCAGCCAACACTTG  |
| F55 | <u>GGC</u> ATGACAGGGTACTGTATAAGC  |
| F56 | <u>GGC</u> AGAATCTTATGCACAAACGGA  |
| F57 | <u>GGCAGACT</u> ACTATGCTCGTGTTGA  |
| F58 | <u>GGC</u> ATAAGATTTGAGATAATCTCC  |
| F59 | <u>GGC</u> ATCAAATCTTAGCAAAGCTGC  |
| F60 | <u>GGC</u> AATCAATATCTGGTCTCATGG  |
| F61 | <u>GGC</u> ACACTGCTAGAGCATTTAGCG  |
| F62 | <u>GGC</u> ATAGCGTGGTGGCTTCTGCTT  |
| F63 | <u>GGC</u> ATCCTGGCAAGCTCGGCACAC  |
| F64 | <u>GGC</u> AACCAGTGTGCCGAGCTTGCC  |
| F65 | <u>GGC</u> ACAGCAGATTGCTATTCTTAT  |
| F66 | <u>GGC</u> ACATGCTCAATGATCTCAACT  |
| F67 | <u>GGCAGT</u> GACGAGAACCAGAAAGTG  |
| F68 | <u>GGC</u> ACAGTGATTGTCCGCACTTTC  |
| F69 | <u>GGC</u> AAAGGGTATCAGATCTCACCG  |
| F70 | <u>GGC</u> AAGGCAGCAAGAACCTTTCCA  |
| F71 | <u>GGCAGCT</u> GCCTTCTTGAAAGCTAT  |
| F72 | <u>GGCAGC</u> ATACAGCGCATCCATAAG  |
| F73 | <u>GGCAGT</u> GACTGGAACCTCCATAATC |
| F74 | <u>GGCAGAT</u> GAAGAAGATTGTCCTGA  |
| F75 | <u>GGCAGT</u> GTAGAGGCTGATTATATC  |
| F76 | <u>GGCAGG</u> GAGAATGGCTCTGGACCGC |
| F77 | <u>GGCAGT</u> AGAGATGGCAAATAAGGT  |
| F78 | <u>GGC</u> ATATTGTTGGGAGGATTGTTG  |
| F79 | <u>GGCAGC</u> CTTACAGGAGAATGGTGA  |
| F80 | <u>GGCAGG</u> TGATGGAAACAATTGAGA  |
| F81 | <u>GGC</u> ATTGGAGGAGCTGCTTATTGA  |
| F82 | <u>GGC</u> ACCACAAATCTGAGGAAGGTA  |
| F83 | <u>GGC</u> AAAGCTGCTGATCTGATCTCG  |
| F84 | <u>GGCAGT</u> GTCAGGAGGAGCAGCTTA  |
| F85 | <u>GGC</u> AGAAGAGTACCCTGAGGTGTT  |
| F86 | <u>GGCAGG</u> AAGAAGATCCTTGATTGG  |
| F87 | <u>GGC</u> AGAATAGGCATGAGAAGGTCC  |
| F88 | <u>GGCAG</u> GAGAACTGCATTGATCTAGT |
| F89 | <u>GGCAGTT</u> GGTAGGATTGCTGATCG  |
| F90 | <u>GGC</u> ATGCCTGCTAGGGAGTGGATG  |
| F91 | <u>GGC</u> AAATGTTGAAGGCTCACAAGA  |

|                 |                                   |
|-----------------|-----------------------------------|
| F92 (HR-target) | <u>GGCA</u> ATGTTGAAGGCTCACAAGAA  |
| F93             | <u>GGCA</u> AGGCTCACAAGAAGGGTATT  |
| F94             | <u>GGCA</u> CTCACAAGAAGGGTATTAGA  |
| F95             | <u>GGCA</u> GGTTATATTGCGAAGGCTAT  |
| F96             | <u>GGCA</u> GTTGAATAACTTGAAGGTGC  |
| F97             | <u>GGCA</u> TTGCGACAGTTGTGCAGACA  |
| F98             | <u>GGCA</u> GGACTCGGTAATTCATC     |
| F99             | <u>GGCA</u> GTATATTGGTGAGATGGGCA  |
| F100            | <u>GGCA</u> CATTAGAGCATCTTCAAGCA  |
| F101            | <u>GGCA</u> GCTGTGAAGCACATGGCTCT  |
| F102            | <u>GGCA</u> TGTTGCTGGCTTGGGCTGTG  |
| F103            | <u>GGCA</u> GCTGTCATGGAGGCGATTGA  |
| F104            | <u>GGCA</u> GAGGGGATGAGAGTTGCTCT  |
| F105            | <u>GGCA</u> CAGTAATTCAGATCACAGC   |
| F106            | <u>GGCA</u> CACGTAATTCCTTGTGGA    |
| F107            | <u>GGCA</u> TCCTGCACTGGATGACGATG  |
| F108            | <u>GGCA</u> TATCTACAGCCGTCAGAGC   |
| F109            | <u>GGCA</u> GATGAGACTCCTGCAAGTAT  |
| F110            | <u>GGCA</u> TTCTCTCCTTCTGCTCTC    |
| F111            | <u>GGCA</u> AAAAGCAAGGGAATTTGGTGC |
| F112            | <u>GGCA</u> GGTAGAATCTTGTGAACAA   |
| F113            | <u>GGCA</u> TCATCAATGTTATCAATATC  |
| F114            | <u>GGCA</u> ATAACATTGATGAGTATGTG  |
| F115            | <u>GGCA</u> CACGCTAAATGCTCTAGCAG  |
| F116            | <u>GGCA</u> TCATCTCTTCATCTGGTGAC  |
| F117            | <u>GGCA</u> ATCTTCTTCATCTCTTCATC  |
| F118            | <u>GGCA</u> CAGCAGAGGCAGCAGTTTGC  |
| F119            | <u>GGCA</u> CACATTTGGTTATATTGCGA  |
| R1              | <u>AAAC</u> CCTGCGCCCGCGGAGCTCC   |
| R2              | <u>AAAC</u> CCTCCATCTTCTTGCCTCC   |
| R3              | <u>AAAC</u> CCGGCGCGCCCATGGCCGTC  |
| R4              | <u>AAAC</u> TCGACACCGATCTCTACGGC  |
| R5              | <u>AAAC</u> ACCCCAACCGCTTCGCCGGC  |
| R6              | <u>AAAC</u> CCATCCCCGCCTCCGAGGAC  |
| R7              | <u>AAAC</u> CGGGCGCGTCGTCCTCGGAG  |
| R8              | <u>AAAC</u> AGGCGGCCGTCACCCCGCC   |
| R9              | <u>AAAC</u> GCCGCCTCGCCTCCTACACC  |
| R10             | <u>AAAC</u> GCCACGCCGTCGCCGCCGCC  |
| R11             | <u>AAAC</u> CGGCGGCGGGGGATGTGC    |
| R12             | <u>AAAC</u> AGAAGTCGACGCGATCATC   |
| R13             | <u>AAAC</u> CGAGGATGACTATCGCCGCC  |
| R14             | <u>AAAC</u> GCGAGATGATGCGGGCCAGC  |
| R15             | <u>AAAC</u> GAGCGCCATGATCCCTTCGC  |
| R16             | <u>AAAC</u> CACGGAAGGGTCCGGGGTGG  |

|     |                                  |
|-----|----------------------------------|
| R17 | <u>AAACATGCCATGCGCGAGAATGAC</u>  |
| R18 | <u>AAACGCAGAAGCAGAAGGAGCAGC</u>  |
| R19 | <u>AAACTCTTCTTCTGAGCTATGTCA</u>  |
| R20 | <u>AAACTCTTCTCCTTGGCCTTCTCC</u>  |
| R21 | <u>AAACATCTATTGCGGCGCTTCGGC</u>  |
| R22 | <u>AAACGCGACTGATCCCATCTATTG</u>  |
| R23 | <u>AAACGCAGCAGCAGAAGCATCACC</u>  |
| R24 | <u>AAACAATCGGAGGAGGTCTTCGCC</u>  |
| R25 | <u>AAACGGAGTTGCATCAGGAGCATC</u>  |
| R26 | <u>AAACGGGGTGGCATCCCAGCGCCC</u>  |
| R27 | <u>AAACCTGGTCGTGTCGGGGATGCG</u>  |
| R28 | <u>AAACAACGATTCCCTTCTCACCGAC</u> |
| R29 | <u>AAACTCGGTGAGAAGGAATCGTTG</u>  |
| R30 | <u>AAACATGCGGATGCAACACCTGCA</u>  |
| R31 | <u>AAACGGAGTAATGCCACCAGCTGC</u>  |
| R32 | <u>AAACTCTGGAGCTTGGGATGCTAC</u>  |
| R33 | <u>AAACGGTGGGCTTGTCACGCCAAC</u>  |
| R34 | <u>AAACACACCCAAGAAGCAGAGATC</u>  |
| R35 | <u>AAACGCAAGTATGGGTAGTGCTAC</u>  |
| R36 | <u>AAACGGAGGCACTGGTGCTGCGAC</u>  |
| R37 | <u>AAACGCAGTTACACTCCTGGTCC</u>   |
| R38 | <u>AAACTTTGGTGGTGACAACCTTGC</u>  |
| R39 | <u>AAACACACCCGCCAGATTGCTTC</u>   |
| R40 | <u>AAACCAAGAGCTGGTACTGCTCTG</u>  |
| R41 | <u>AAACCATCCGTAAGAGGCCTGTTC</u>  |
| R42 | <u>AAACGCGGGAACATAGTATCAAGC</u>  |
| R43 | <u>AAACCAGGAAGGGTACAAGATTCT</u>  |
| R44 | <u>AAACGCTTCATACCAACCCATACG</u>  |
| R45 | <u>AAACGCAAGAAAGCTGCTCGCTAC</u>  |
| R46 | <u>AAACCAGGAATAGCATACAATGGT</u>  |
| R47 | <u>AAACCGATTCTCCTCAGGAATAGC</u>  |
| R48 | <u>AAACCCAGGCAACTCCTTGGGCAC</u>  |
| R49 | <u>AAACCTGGCTTCATGAGGGGCAAC</u>  |
| R50 | <u>AAACGTACTTTGGAACATTGCTGA</u>  |
| R51 | <u>AAACTCTGCTCTTCTGGAGATAGC</u>  |
| R52 | <u>AAACTGAGCAGGAGCTTCATGATC</u>  |
| R53 | <u>AAACCAGCGGAAGACAGCACTTCG</u>  |
| R54 | <u>AAACCAAGTGTGGCTGCATGAGC</u>   |
| R55 | <u>AAACGCTTATACAGTACCCTGTCA</u>  |
| R56 | <u>AAACTCCGTTTGTGCATAAGATTC</u>  |
| R57 | <u>AAACTCAACACGAGCATAGTAGTC</u>  |
| R58 | <u>AAACGGAGATTATCTCAAATCTTA</u>  |
| R59 | <u>AAACGCAGCTTTGCTAAGATTTGA</u>  |
| R60 | <u>AAACCCATGAGACCAGATATTGAT</u>  |



|                 |                                  |
|-----------------|----------------------------------|
| R61             | <u>AAAC</u> CGCTAAATGCTCTAGCAGTG |
| R62             | <u>AAACA</u> AGCAGAAGCCACCACGCTA |
| R63             | <u>AAAC</u> GTGTGCCGAGCTTGCCAGGA |
| R64             | <u>AAAC</u> GGCAAGCTCGGCACACTGGT |
| R65             | <u>AAAC</u> ATAAGAATAGCAATCTGCTG |
| R66             | <u>AAAC</u> AGTTGAGATCATTGAGCATG |
| R67             | <u>AAAC</u> CACTTTCTGGTTCTCGTCAC |
| R68             | <u>AAAC</u> GAAAGTGGGACAATCACTG  |
| R69             | <u>AAAC</u> CGGTGAGATCTGATACCCTT |
| R70             | <u>AAAC</u> TGGAAAGGTTCTTGCTGCCT |
| R71             | <u>AAAC</u> ATAGCTTCAAGAAGGCAGC  |
| R72             | <u>AAAC</u> CTTATGGATGCGCTGTATGC |
| R73             | <u>AAAC</u> GATTAGGGAGTTCCAGTCAC |
| R74             | <u>AAAC</u> TCAGGACAATCTTCTTCATC |
| R75             | <u>AAAC</u> GATATAATCAGCCTCTACAC |
| R76             | <u>AAAC</u> GCGGTCCAGAGCCATTCTCC |
| R77             | <u>AAAC</u> ACCTTATTTGCCATCTCTAC |
| R78             | <u>AAAC</u> CAACAATCCTCCCAACAATA |
| R79             | <u>AAAC</u> TCACCATTCTCCTGTAAGGC |
| R80             | <u>AAAC</u> TCTCAATTGTTTCCATCACC |
| R81             | <u>AAAC</u> TCAATAAGCAGCTCCTCCAA |
| R82             | <u>AAAC</u> TACCTTCTCAGATTTGTGG  |
| R83             | <u>AAAC</u> CGAGATCAGATCAGCAGCTT |
| R84             | <u>AAAC</u> TAAGCTGCTCCTCCTGACAC |
| R85             | <u>AAAC</u> AACACCTCAGGGTACTCTTC |
| R86             | <u>AAAC</u> CCAATCAAGGATCTTCTCC  |
| R87             | <u>AAAC</u> GGACCTTCTCATGCCTATTC |
| R88             | <u>AAAC</u> ACTAGATCAATGCAGTTCTC |
| R89             | <u>AAAC</u> CGATCAGCAATCCTACCAAC |
| R90             | <u>AAAC</u> CATCCACTCCCTAGCAGGCA |
| R91             | <u>AAAC</u> TCTTGTGAGCCTTCAACATT |
| R92 (HR-target) | <u>AAAC</u> TTCTTGTGAGCCTTCAACAT |
| R93             | <u>AAACA</u> ATACCCTTCTTGTGAGCCT |
| R94             | <u>AAAC</u> TCTAATACCCTTCTTGTGAG |
| R95             | <u>AAAC</u> ATAGCCTTCGCAATATAACC |
| R96             | <u>AAAC</u> GCACCTTCAAGTTATTCAAC |
| R97             | <u>AAAC</u> TGTCTGCACAACTGTCGCAA |
| R98             | <u>AAAC</u> GATGAATGAGTACCGAGTCC |
| R99             | <u>AAAC</u> TGCCCATCTCACCAATATAC |
| R100            | <u>AAAC</u> TGCTTGAAGATGCTCTAATG |
| R101            | <u>AAAC</u> AGAGCCATGTGCTTACAGC  |
| R102            | <u>AAAC</u> CACAGCCAAGCCAGCAACA  |
| R103            | <u>AAAC</u> TCAATCGCCTCCATGACAGC |
| R104            | <u>AAAC</u> AGAGCAACTCTCATCCCCTC |

|      |                                   |
|------|-----------------------------------|
| R105 | <u>AAAC</u> GCTGTGATCTTGAATTACTG  |
| R106 | <u>AAACT</u> CCAGCAAGGAAAGTACGTG  |
| R107 | <u>AAAC</u> CATCGTCATCCAGTGCAGGA  |
| R108 | <u>AAAC</u> GCTCTGGACGGCTGTAGATA  |
| R109 | <u>AAAC</u> CATACTTGCAGGAGTCTCATC |
| R110 | <u>AAAC</u> GGAAGAGCAGAAGGAGAGGAA |
| R111 | <u>AAAC</u> GCACCAAATTCCCTTGCTTT  |
| R112 | <u>AAACT</u> TGTTCAACAAGATTCTACC  |
| R113 | <u>AAAC</u> GATATTGATAACATTGATGA  |
| R114 | <u>AAAC</u> CACATACTCATCAATGTTAT  |
| R115 | <u>AAAC</u> CTGCTAGAGCATTAGCGTG   |
| R116 | <u>AAAC</u> GTCACCAGATGAAGAGATGA  |
| R117 | <u>AAAC</u> GATGAAGAGATGAAGAAGAT  |
| R118 | <u>AAAC</u> GCAAACCTGCTGCCTCTGCTG |
| R119 | <u>AAACT</u> CGCAATATAACCAAATGTG  |

**Table S3: List of primers used for genotyping**

| Name of the primer | Sequence (5' - 3')     |
|--------------------|------------------------|
| F1                 | CTAACCGCCTCTCCCCCGCC   |
| F2                 | AAGAAGATGGAGGAGGCCCTT  |
| F3                 | CTTCCGTGCGGACCTATGCC   |
| F4                 | AAGGAGAAGAAGGCCGTGCC   |
| F5                 | ACCGTCGGTGAGAAGGAATCGT |

|         |                             |
|---------|-----------------------------|
| F6      | AGAAAGCTGCTCGCTACACCA       |
| F7      | GCGGAAGACAGCACTTCGACAA      |
| F8      | CAAAGCTGCTGGTCTTGCTACC      |
| F9      | CCACATCTCAAGTCCCTAGTT       |
| F10     | GATGGAAACAATTGAGAAGGTT      |
| F11     | ACAAGCTGCTGATCTGATCTCG      |
| F12     | GCAAAAACCGTGTCTGCACA        |
| F13     | TTGCTTAACTATGTCTGGCCA       |
| R1      | CAACGGCAACAAAGTAAACATT      |
| R2      | CCACCGAGTTCAAGCTTCACAG      |
| R3      | CATAGAATTCTAACATATCAATGTA   |
| R4      | CAATAATATATGCCACAAAATTTAAGC |
| R5      | TCATCAGGGCAGGCAGAACC        |
| R6      | ATAAGCTGCTCCTCCTGACAC       |
| R7      | TGAAGCACCCAAATTAGCCACA      |
| R8      | GTCTCATGGCGGCAATCATG        |
| R9      | GGTAATCCTCTGGCTTCATGAG      |
| R10     | ACGATTCTTCTCACCGACGGT       |
| R11     | CTGCCACTGGCTGCTGCTCG        |
| R12     | CTTCCTTCTTCTTCTGAGCTATG     |
| T-DNA-F | CACAGGAAACAGCTATGAC         |
| T-DNA-R | CGCGCTAAAAACGGACTAG         |

**Table S4: CDE-platform for SF3B1 resistance to splicing inhibitor**

|                                                            | CRISPR-directed evolution of SF3B1 via targeted sgRNA library |             |             | Directed evolution of SF3B1 via domain-specific sgRNAs |             |                              |              |                              |
|------------------------------------------------------------|---------------------------------------------------------------|-------------|-------------|--------------------------------------------------------|-------------|------------------------------|--------------|------------------------------|
| No. of transformation                                      | 2                                                             |             |             | 1 (One for each sgRNA)                                 |             |                              |              |                              |
| No. of sgRNAs                                              | 119 (in an sgRNA library transformed to Agrobacterium)        |             |             | 3                                                      |             |                              |              |                              |
|                                                            |                                                               |             |             | sgRNA-92                                               |             | sgRNA-119                    | PTG          |                              |
| No. of calli transformed                                   | ~15,000                                                       |             |             | 1000                                                   |             | 1000                         | 1000         |                              |
| No. of shoots/plants recovered on GEX1A supplemented media | 21 seedlings from 0.4 $\mu$ M                                 |             |             | 8 seedlings from 0.4 $\mu$ M                           |             | 4 seedlings from 0.6 $\mu$ M | No seedlings | 5 seedlings from 0.4 $\mu$ M |
| No. of plants showing SF3B1 editing                        | <i>SGR1</i>                                                   | <i>SGR2</i> | <i>SGR3</i> | <i>SGR3</i>                                            | <i>SGR5</i> | <i>SGR4</i>                  | —            | <i>SGR6</i>                  |
|                                                            | 2                                                             | 2           | 3           | 3                                                      | 2           | 2                            |              | 2                            |
| Heritability of GEX1A resistance in seed progeny (T1)      | <i>SGR1</i>                                                   | <i>SGR2</i> | <i>SGR3</i> | <i>SGR3</i>                                            | <i>SGR5</i> | <i>SGR4</i>                  | —            | <i>SGR6</i>                  |
|                                                            | 2                                                             | 2           | 3           | 3                                                      | 2           | 2                            |              | 2                            |

\*Please note that all false positives exhibit no SF3B1 editing and their seed progeny is sensitive to GEX1A

\*\*Please note that one set of transformation was conducted without GEX1A selection for targeted mutagenesis of SF3B1 and no functional knock out mutant could be recovered from these (except one in-frame mutant *SGS1*).

**Table S5: List of primers used for Intron retention analysis**

| Name of the primer | Sequence (5' - 3')        |
|--------------------|---------------------------|
| 03g55590_F         | GCTACTCCAAAGCAAATCAGGGAG  |
| 03g55590_R         | CGGACATAGCCTTCCGACTTG     |
| 04g37790_F         | GTCTTCTAATTCGGTTCCTGACACG |
| 04g37790_R         | GGGGACGGCTTGAATCCTTG      |
| 04g57440_F         | GCTAAGGTTGTGAGCATCGATGG   |
| 04g57440_R         | CCAAGAGTTGCGGACAATCCAG    |
| 07g08460_F         | GGGAGGAGGGCTGTATGTGAAG    |
| 07g08460_R         | CTGGCTTCAGAGCCCTTCATG     |
| 07g35350_F         | CGGACTGCAGTGCTATCCAACAG   |
| 07g35350_R         | CATTGAATGCATAGGTCGCATGCG  |
| 07g48510_F         | GGAGGTGCTGTTCTTGCAAGTG    |
| 07g48510_R         | TTGGGACAAGGTCTTGGTTTGG    |
| 08g36910_F         | GAGATCGATCAGTAGTGGTTAGCAG |
| 08g36910_R         | GCGTCCAGGTCGTAGAGACG      |
| 08g44390_F         | GAGAAGCTCTACGCAGTCTTGG    |
| 08g44390_R         | GGACAATGAAGGAATGACCATTG   |
| 10g31850_F         | GCATGGGGAAATACTTCTGCG     |
| 10g31850_R         | TCGAAGCAGACAGGACAGTTG     |
